# Supplementary material for: Ice thickness and water level estimation for ice-covered lakes with satellite altimetry waveforms and backscattering coefficients
Source: Copernicus journal article supplement (doi:10.5194/tc-2022-132), 2022-07-26
Supplement: Supplementary file 1 [file tc-2022-132-supplement.pdf]

# Ice thickness and water level estimation for ice-covered lakes with satellite altimetry waveforms and backscattering coefficients:

## Supplementary Information

Xingdong Li<sup>1, 3</sup>, Di Long<sup>1, 3</sup>, Yanhong Cui<sup>1, 3</sup>, Tingxi Liu<sup>2, 3</sup>, Jing Lu<sup>4</sup>, Mohamed A. Hamouda<sup>5, 6</sup>, and Mohamed M. Mohamed<sup>5, 6</sup>

<sup>1</sup>State Key Laboratory of Hydrosience and Engineering, Department of Hydraulic Engineering, Tsinghua University, Beijing 100084, China

<sup>2</sup>Water Conservancy and Civil Engineering College, Inner Mongolia Key Laboratory of Water Resource Protection and Utilization, Inner Mongolia Agricultural University, Hohhot, 010018, China

<sup>3</sup>Collaborative Innovation Center for Integrated Management of Water Resources and Water Environment in the Inner Mongolia Reaches of the Yellow River, Hohhot, 010018, China

<sup>4</sup>State Key Laboratory of Remote Sensing Science, Aerospace Information Research Institute, Chinese Academy of Sciences, Beijing 100101, China

<sup>5</sup>Department of Civil and Environmental Engineering, United Arab Emirates University, Al Ain, 15551, United Arab Emirates

<sup>6</sup>National Water and Energy Center, United Arab Emirates University, Al Ain, 15551, United Arab Emirates

*Correspondence to:* Di Long (dlong@tsinghua.edu.cn) and Tingxi Liu (txliu1966@163.com)

### Supplementary Text 1:

#### Quantification of the remaining systematic biases in altimetric water levels

Here we provide an analysis of the source and magnitude of possible remaining systematic biases based on Jason-2 and Jason-3. The analysis for Jason-1 and Jason-2 would be similar but with a slightly different length of overlapping periods. Assuming that the real LSH variation during the overlapping period is  $H(t)$ , LSH observations from Jason-2 during the overlapping period can be represented by the following equation:

$$H_1(t_i) = H(t_i) + \theta_1(t_i) + \alpha \quad (\text{S1})$$

where  $H_1(t_i)$  is the LSH observation obtained by Jason-2 at time  $t_i$ , subscript  $i$  indicates the  $i$ -th Jason-2 observation during the overlapping period,  $\theta_1$  represents the random error for each Jason-2 LSH observation, and  $\alpha$  denotes the systematic bias between Jason-2 observations and the real LSH. Similarly, the LSH observation from Jason-3 during the overlapping period can be represented by:

$$H_2(t_j) = H(t_j) + \theta_2(t_j) + \beta \quad (\text{S2})$$

where  $H_2, j, \theta_2$ , and  $\beta$  have the same meaning as  $H_1, i, \theta_1$ , and  $\alpha$  but for Jason-3. Removing the systematic bias between Jason-2 and Jason-3 is equivalent to estimating the value of  $\alpha - \beta$ , wherein we use the difference between the mean LSHs from Jason-2 and Jason-3 during the overlapping period:

$$\begin{aligned} \text{system bias} &= \frac{1}{N} \sum_{i=1}^N [H_1(t_i)] - \frac{1}{N} \sum_{j=1}^N [H_2(t_j)] = (\alpha - \beta) + \frac{1}{N} \sum_{i=1, j=1}^N [\theta_1(t_i) - \theta_2(t_j)] + \\ &\frac{1}{N} \sum_{i=1, j=1}^N [H(t_i) - H(t_j)] \end{aligned} \quad (\text{S3})$$

where  $N$  is the number of observations during the overlapping period (for simplicity, we assume Jason-2 and Jason-3 to have the same number of observations during this period). Based on Equation (S3), the remaining systematic biases are caused by sensor random errors (termed  $\theta_1$  and  $\theta_2$ ) in each observation and the difference in sampling dates between Jason-2 and Jason-3 (termed  $H(t_i)$  and  $H(t_j)$ ).

The random errors  $\theta_1$  and  $\theta_2$  have standard deviations  $\sigma_1$  and  $\sigma_2$ , which are  $\sim 0.1$  m for both Jason-2 and Jason-3 in large lakes. The bias caused by the difference in sampling time is hard to predict because it is related to the LSH variation itself. However, an extreme example can be used to estimate the upper bounds of this uncertainty source. The difference caused by the sampling time is maximized when every pair of  $[H(t_i) - H(t_j)]$  is positive or negative. Therefore, we can assume that the LSH constantly decreases during the overlapping period and each pair of Jason-2 and Jason-3 observations have a constant delay smaller than one repeat cycle. In this way, for each pair of  $i$  and  $j$ ,  $H(t_i) > H(t_j) \geq H(t_{i+1})$ . Therefore, we can derive the upper bounds of the possible remaining systematic bias caused by the sampling time as:

$$\left( \frac{1}{N} \sum_{i=1, j=1}^N [H(t_i) - H(t_j)] \right) \leq \left( \frac{1}{N} \sum_{i=1}^N [H(t_i) - H(t_{i+1})] \right) = \frac{1}{N} [H(t_1) - H(t_{N+1})] \leq \frac{1}{N} \Delta H_m \quad (\text{S4})$$

where  $\Delta H_m$  is the maximum LSH change during the overlapping period. Based on Equation (S3–S4) and the error propagation formula, the maximum possible remaining systematic bias can be written as:

$$\sigma(\text{System bias}) =$$

$$\sqrt{\sigma\left(\frac{1}{N}\sum_{j=1}^N\theta_1(t_i)\right)^2 + \sigma\left(\frac{1}{N}\sum_{j=1}^N\theta_2(t_j)\right)^2 + \sigma\left(\frac{1}{N}\sum_{i=1,j=1}^N[H(t_i) - H(t_j)]\right)^2} \leq \sqrt{\frac{\sigma_1^2}{N} + \frac{\sigma_2^2}{N} + \frac{\Delta H m^2}{N^2}} \quad (\text{S5})$$

In general, the overlapping period of Jason-2 and Jason-3 is ~9 months so  $N$  is ~27. For Jason-1 and Jason-2 the overlapping period is ~8 months which gives an  $N$  of ~24. If the lake is large enough (such as GSL and GBL) such that it is covered by interleaved ground tracks, the overlapping period between Jason-1 and Jason-2 can be extended to ~ 3.5 years corresponding to an  $N$  of ~120 while that of Jason-2 and Jason-3 can be extended to ~ 13 months corresponding to an  $N$  of ~40. Here we use an  $N$  of 25 to represent the most common situations. In addition, the intra-annual maximum LSH changes for large lakes are most likely ~ 1 m. Therefore, the maximum remaining systematic bias can be estimated with equation (S5) as  $(0.1^2/25 + 0.1^2/25 + 1^2/25^2)^{1/2} = 0.049$  m. We can conclude that under the worst case, the remaining systematic biases can be around 5 cm, and it is mostly caused by the difference in sampling time between different sensors.
